# Supplementary material for: Nuclear Factor-κB Overexpression is Correlated with Poor Outcomes after Multimodality Bladder-Preserving Therapy in Patients with Muscle-Invasive Bladder Cancer
Source: PubMed Central journal article supplement (PMC6912291; doi:10.3390/jcm8111954), 2019-11-13

**Table S1.** A list of antibodies used for immunohistochemistry

| Antibody          | Clone                 | Company                                       | Dilution     |
|-------------------|-----------------------|-----------------------------------------------|--------------|
| <b>p53</b>        | DO-7                  | Roche Ventana, Oro Valley, AZ, USA            | Ready-to-Use |
| <b>p16</b>        | E6H4                  | Roche Ventana, Oro Valley, AZ, USA            | Ready-to-Use |
| <b>EGFR</b>       | 31G7                  | Bio SB, Santa Barbara, CA, USA                | 1:50         |
| <b>Her-2</b>      | 4B5                   | Roche Ventana, Oro Valley, AZ, USA            | Ready-to-Use |
| <b>NFκB (p65)</b> | F-16                  | Santa Cruz Biotechnology, Santa Cruz, CA, USA | 1:200        |
| <b>E-cadherin</b> | EP700Y                | Thermo Fisher Scientific, Waltham, MA, USA    | 1:50         |
| <b>MMP9</b>       | rabbit polyclonal     | Bio SB, Santa Barbara, CA, USA                | 1:100        |
| <b>MRE11</b>      | 12D7                  | Abcam, Cambridge, MA, USA                     | 1:200        |
| <b>PD-L1</b>      | SP142                 | Roche Ventana, Oro Valley, AZ, USA            | 1:50         |
| <b>MMR</b>        | <b>MLH1</b> M1        | Roche Ventana, Oro Valley, AZ, USA            | Ready-to-Use |
| <b>proteins</b>   | <b>PMS2</b> EPR3947   |                                               |              |
|                   | <b>MSH2</b> G219-1129 |                                               |              |
|                   | <b>MSH6</b> 44        |                                               |              |

NFκB: Nuclear factor-kappa B; EGFR: Epidermal growth factor receptor; MMP9: matrix metalloproteinase-9 (MMP9); MRE11: meiotic recombination 11 homolog; PD-L1: programmed death-1 ligand

**Table S2.** The scoring criteria of immunohistochemical stained biomarkers

| Biomarkers            | Scoring criteria                                                                                                                                                                                                                                                                                                                                                                                                                                                                                                                                                                             | Definition of positive staining |
|-----------------------|----------------------------------------------------------------------------------------------------------------------------------------------------------------------------------------------------------------------------------------------------------------------------------------------------------------------------------------------------------------------------------------------------------------------------------------------------------------------------------------------------------------------------------------------------------------------------------------------|---------------------------------|
| <b>NFκB (p65)</b>     | score 0: negative; score 1: faint, equivocal; score 2: moderate; score 3: strong                                                                                                                                                                                                                                                                                                                                                                                                                                                                                                             | Score 1-3                       |
| <b>p16</b>            | score 0: negative; score 1: minimal, <1%; score 2: focal, ≥1%, <10%; score 3: partial, ≥10%, <50%; score 4: diffuse, ≥50%                                                                                                                                                                                                                                                                                                                                                                                                                                                                    | Score 2-3                       |
| <b>p53</b>            | score 0: negative, <1%; score 1: focal, ≥1%, <10%; score 3: partial, ≥10%, <50%; score 4: diffuse, ≥50%                                                                                                                                                                                                                                                                                                                                                                                                                                                                                      | Score 0 or Score 4              |
| <b>EGFR and Her-2</b> | score 0: no staining or incomplete membrane staining that is faint/barely perceptible and within ≤10% of tumor cells; score 1: weak, incomplete membranous staining that is faint/barely perceptible and within >10% of tumor cells; score 2: equivocal or indeterminate staining including circumferential membrane staining that is incomplete and/or weak/moderate and >10% of tumor cells or complete and circumferential membrane staining that is intense and within ≤10% of tumor cells; score 3: circumferential membrane staining that is complete, intense and >10% of tumor cells | Score 2-3                       |
| <b>E-cadherin</b>     | score 0: negative; score 1: faint, equivocal; score 2: moderate; score 3: strong                                                                                                                                                                                                                                                                                                                                                                                                                                                                                                             | Score 2-3                       |

|                                           |                                                                                                                                                              |           |
|-------------------------------------------|--------------------------------------------------------------------------------------------------------------------------------------------------------------|-----------|
| <b>MMP9</b>                               | Based on percentage of cytoplasmic staining in the tumor cells and evaluated at a 10%-interval; focal reactivity less than 10% was recorded at a 1%-interval | >0%       |
| <b>MRE11</b>                              | scored on a continuous scale with at least 1000 tumor cells at three or more separate spots counted for each case, and the median was considered as low      | >median   |
| <b>IC of PD-L1</b>                        | scored as percentage of tumor area; score 0: <1%; score 1: ≥1%, <5%; score 2: ≥5%, <10%; score 3: ≥10%                                                       | Score 1-3 |
| <b>TC of PD-L1</b>                        | scored as percentage of PD-L1-expressing tumour cells; score 0: <1%; score 1: ≥1%, <5%; score 2: ≥5%, <50%; score 3: ≥50%                                    | Score 2-3 |
| <b>MMR proteins (PMS2/MLH1/MSH2/MSH6)</b> | loss of staining was designated as complete loss of nuclear staining in all of the tumor nuclei                                                              | >0%       |

NFκB: Nuclear factor-kappa B; EGFR: Epidermal growth factor receptor; MMP9: matrix metalloproteinase-9 (MMP9); MRE11: meiotic recombination 11 homolog; PD-L1: programmed death-1 ligand; IC: immune cell; TC: tumor cell; MMR: mismatch repair.

**Table S3.** Univariate and multivariate analyses of LPFS, DMFS, and OS on clinical prognostic factors and IHC staining expression levels of molecular markers. Unfavorable group: hydronephrosis/hydronephrosis and/or pelvic nodal involvement; Favorable group: other than unfavorable group; NFκB: Nuclear factor-kappa B; EGFR: Epidermal growth factor receptor; MMP9: matrix metalloproteinase-9 (MMP9); MRE11: meiotic recombination 11 homolog; PD-L1: programmed death-1 ligand; IC: immune cell; TC: tumor cell; MMR: mismatch repair; 3y/5y: three-year/five-year.

| Variable     |                         | LPFS       |                 |                |                 | DMFS       |                 |                |                 | OS         |                 |                |                 |
|--------------|-------------------------|------------|-----------------|----------------|-----------------|------------|-----------------|----------------|-----------------|------------|-----------------|----------------|-----------------|
|              |                         | Univariate |                 | Multivariate   |                 | Univariate |                 | Multivariate   |                 | Univariate |                 | Multivariate   |                 |
|              |                         | 3y/5y (%)  | <i>p</i> -value | HR<br>(95% CI) | <i>p</i> -value | 3y/5y (%)  | <i>p</i> -value | HR<br>(95% CI) | <i>p</i> -value | 3y/5y (%)  | <i>p</i> -value | HR<br>(95% CI) | <i>p</i> -value |
| Sex          | Male                    | 80/76      | 0.20            | 1.6            | 0.36            | 92/82      | 0.10            | 2.6            | 0.20            | 92/87      | 0.11            | 1.8            | 0.42            |
|              | Female                  | 74/52      |                 | (0.6–4.8)      |                 | 68/56      |                 | (0.6–11)       |                 | 80/66      |                 | (0.4–7.4)      |                 |
| Age (years)  | ≤70                     | 83/78      | 0.13            | 2.0            | 0.29            | 92/86      | 0.05            | 0.8            | 0.86            | 91/84      | 0.05            | 0.5            | 0.46            |
|              | >70                     | 71/53      |                 | (0.6–6.9)      |                 | 72/65      |                 | (0.2–4.2)      |                 | 76/65      |                 | (0.1–2.7)      |                 |
| Clinical     | T2                      | 75/64      | 0.72            | 2.9            | 0.11            | 79/74      | 0.91            | 5.5            | 0.10            | 86/78      | 0.93            | 4.0            | 0.15            |
| T stage      | T3                      | 82/73      |                 | (0.8–6.9)      |                 | 90/66      |                 | (0.7–42)       |                 | 82/65      |                 | (0.6–26)       |                 |
| Risk factors | Favorable group         | 75/68      | 0.43            | 1.3            | 0.69            | 88/81      | 0.04            | 0.5            | 0.34            | 87/81      | 0.05            | 0.5            | 0.45            |
|              | Unfavorable group       | 87/58      |                 | (0.3–4.9)      |                 | 75/50      |                 | (0.1–2.3)      |                 | 73/49      |                 | (0.1–2.6)      |                 |
| NFκB (p65)   | Negative (≤0)           | 87/66      | 0.05            | 0.1            | 0.001           | 92/85      | 0.03            | 0.1            | 0.01            | 91/82      | 0.04            | 0.1            | 0.014           |
|              | Positive (>0)           | 60/53      |                 | (0.04–0.5)     |                 | 67/53      |                 | (0.02–0.6)     |                 | 73/60      |                 | (0.03–0.7)     |                 |
| p16          | Negative (score 0–1)    | 66/52      | 0.01            | 18             | 0.002           | 75/62      | 0.10            | 5.2            | 0.10            | 83/69      | 0.11            | 3.4            | 0.18            |
|              | Positive (score 2–3)    | 87/77      |                 | (3.0–110)      |                 | 93/85      |                 | (0.8–36)       |                 | 93/84      |                 | (0.6–21)       |                 |
| p53          | Negative (score 0 or 4) | 67/53      | 0.09            | 8.3            | 0.005           | 76/61      | 0.08            | 5.3            | 0.09            | 79/70      | 0.08            | 5.5            | 0.09            |
|              | Positive (score 1–3)    | 93/80      |                 | (1.9–37)       |                 | 93/86      |                 | (0.8–35)       |                 | 93/86      |                 | (0.8–38)       |                 |
| EGFR         | Negative (score 0–1)    | 78/66      | 0.99            |                |                 | 90/84      | 0.16            |                |                 | 95/83      | 0.18            |                |                 |
|              | Positive (score 2–3)    | 77/57      |                 |                |                 | 68/57      |                 |                |                 | 76/68      |                 |                |                 |

|                   |                         |       |      |       |      |       |      |
|-------------------|-------------------------|-------|------|-------|------|-------|------|
| <b>Her-2</b>      | Negative (score 0–1)    | 83/64 | 0.38 | 79/70 | 0.40 | 86/74 | 0.41 |
|                   | Positive (score 2–3)    | 66/56 |      | 91/79 |      | 92/79 |      |
| <b>E-cadherin</b> | Negative (score 0–1)    | 67/67 | 0.74 | 67/67 | 0.53 | 83/67 | 0.58 |
|                   | Positive (score 2–3)    | 80/66 |      | 85/77 |      | 91/81 |      |
| <b>MMP9</b>       | Negative ( $\leq 0$ )   | 77/70 | 0.31 | 83/75 | 0.83 | 67/80 | 0.93 |
|                   | Positive ( $> 0$ )      | 82/50 |      | 91/82 |      | 91/76 |      |
| <b>MRE11</b>      | Low ( $\leq$ median)    | 77/68 | 0.53 | 86/77 | 0.50 | 86/78 | 0.43 |
|                   | High ( $>$ median)      | 78/56 |      | 77/57 |      | 82/75 |      |
| <b>PD-L1 IC</b>   | Negative ( $\leq 0$ )   | 74/56 | 0.55 | 87/75 | 0.96 | 91/82 | 0.97 |
|                   | Positive ( $> 0$ )      | 82/70 |      | 77/77 |      | 82/76 |      |
| <b>PD-L1 TC</b>   | Negative ( $\leq 5\%$ ) | 83/58 | 0.55 | 85/76 | 0.93 | 89/74 | 0.99 |
|                   | Positive ( $> 5\%$ )    | 67/67 |      | 75/75 |      | 83/75 |      |

**Figure S1.** The images of Western blot showing the decreased p50 and p-p65 proteins of the knock-down cells

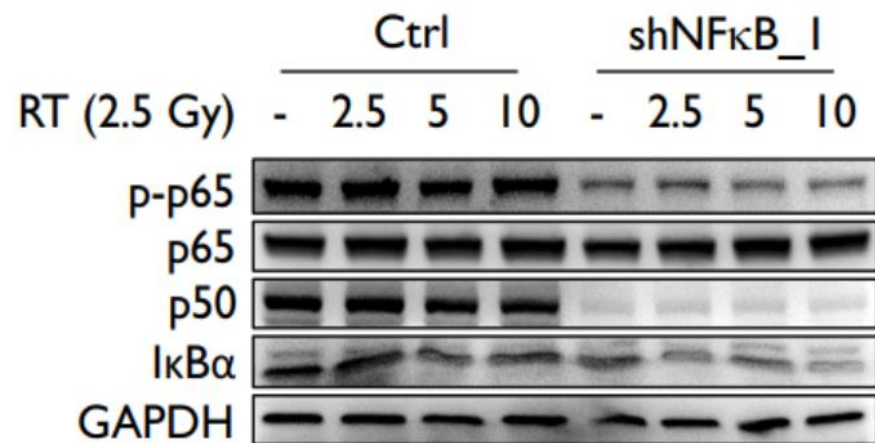

**Figure S2.** Representative microphotographs of immunohistochemical staining of positive and negative NFκB and p16 at magnifications of x200 in patients with bladder cancer undergoing trimodality bladder-preserving therapy.

**Negative NFκB staining**

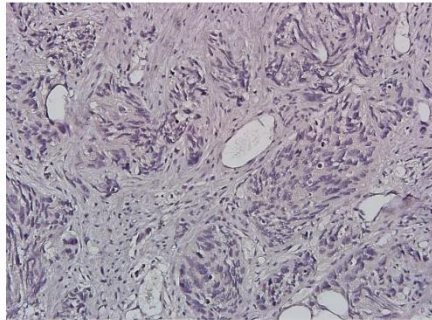

**Positive NFκB staining**

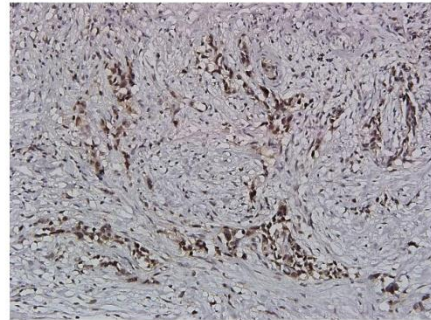

**Negative p16 staining**

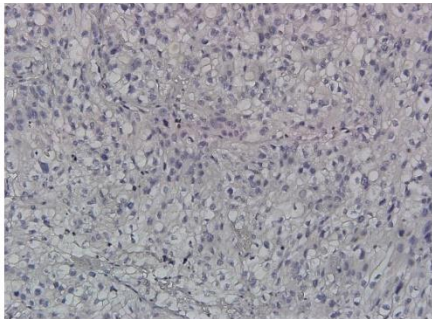

**Positive p16 staining**

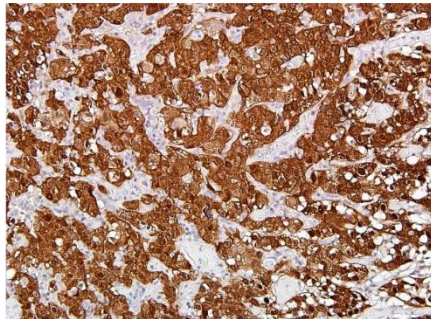



**Figure S3.** Kaplan-Meier curves of (A) distant metastasis-free survival (DMFS) and (B) overall survival (OS) stratified by the immunohistochemical staining of p16.

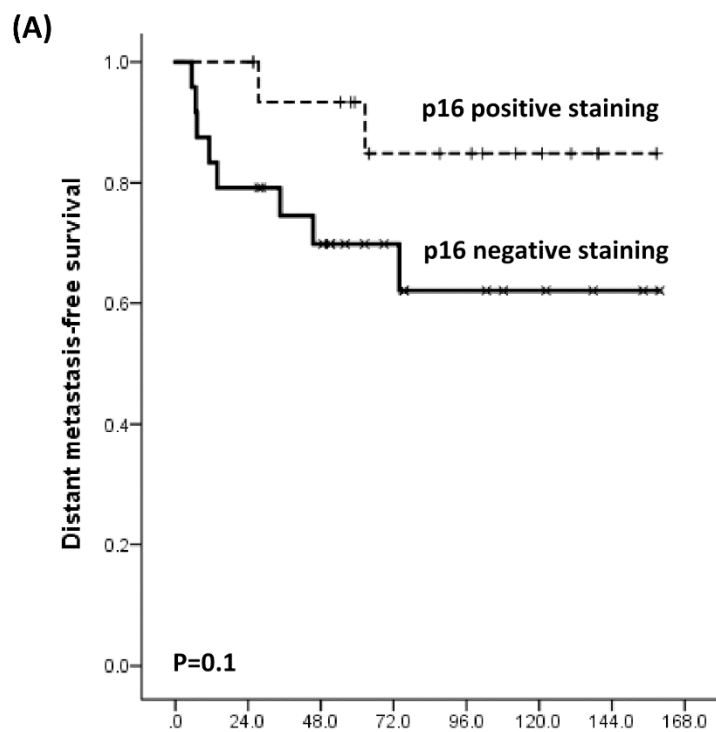

|                           | 0  | 24.0 | 48.0 | 72.0 | 96.0 | 120.0 | 144.0 | 168.0 |
|---------------------------|----|------|------|------|------|-------|-------|-------|
| p16 positive staining (N) | 17 | 15   | 13   | 8    | 7    | 4     | 1     | 0     |
| p16 negative staining (N) | 24 | 18   | 14   | 9    | 6    | 3     | 1     | 0     |

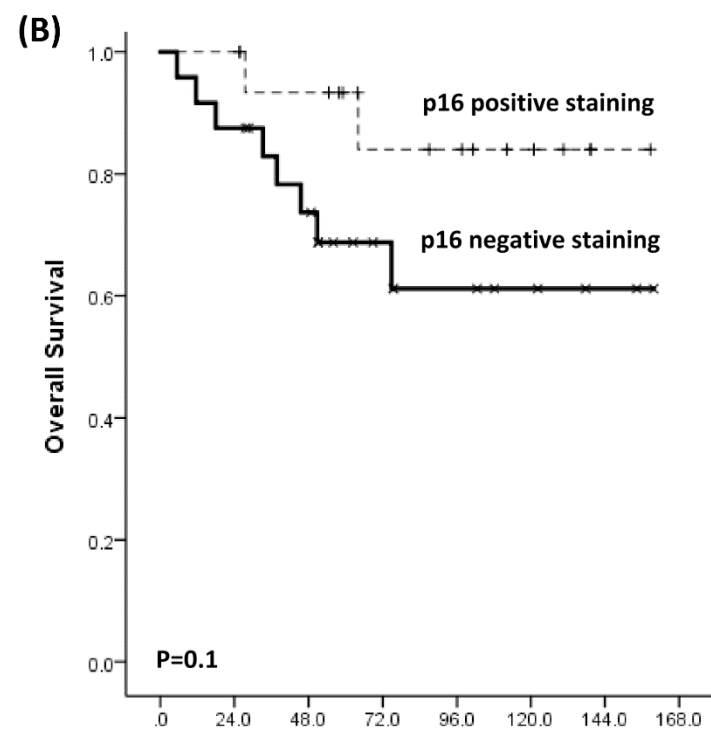

|                           | 0  | 24.0 | 48.0 | 72.0 | 96.0 | 120.0 | 144.0 | 168.0 |
|---------------------------|----|------|------|------|------|-------|-------|-------|
| p16 positive staining (N) | 17 | 15   | 12   | 9    | 8    | 4     | 1     | 0     |
| p16 negative staining (N) | 24 | 20   | 15   | 9    | 5    | 3     | 1     | 0     |

**Figure S4.** Representative microphotographs of immunohistochemical staining of positive and NFκB in pre-treatment and recurrent bladder tumors at magnifications of x200.

**Pre-treatment NFκB staining**

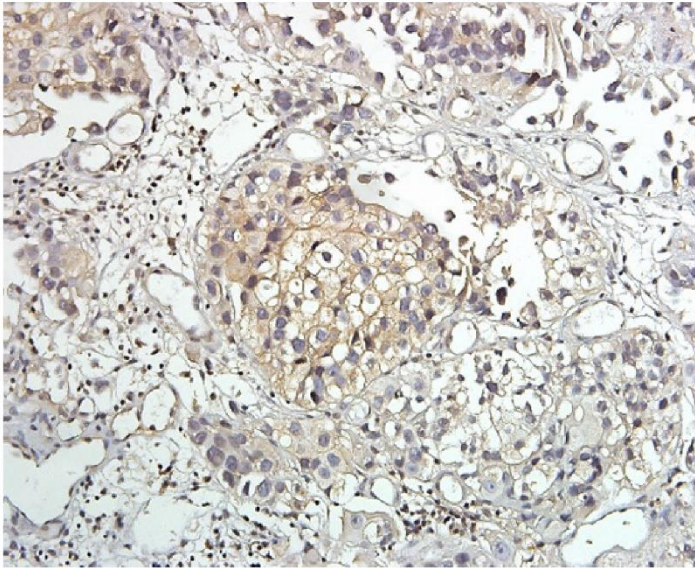

**NFκB staining at recurrence**

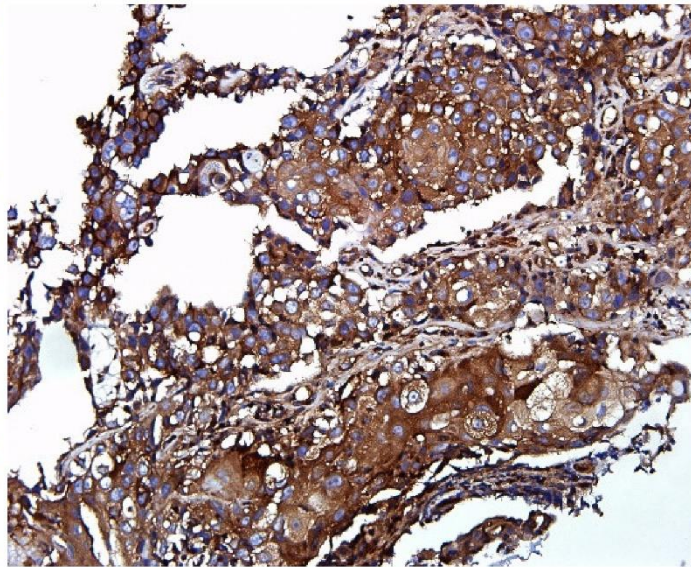

**Figure S5.** Concentrations (pg/ml) of IL-1 $\beta$  by ELISA at 24hr after 10-Gy or 20-Gy irradiation (RT) of MB49 wild type (WT) cells and MB49 NF $\kappa$ B knock-down (KD) cells.

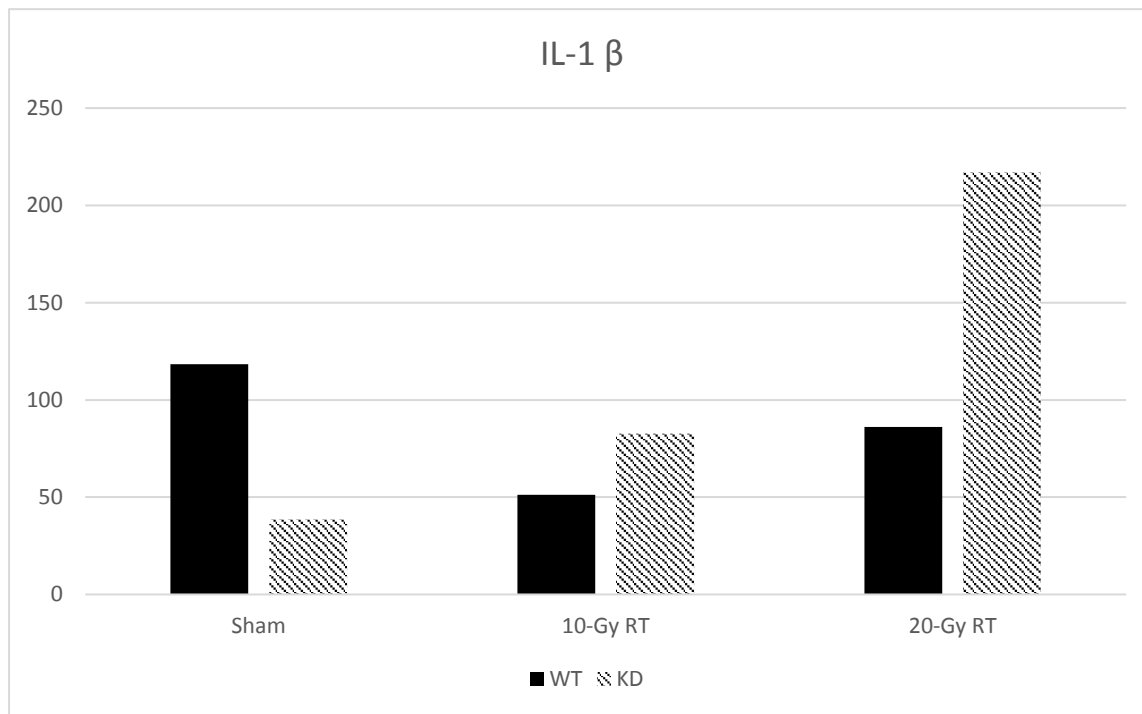

**Figure S6.** Colony formation assays of irradiated (0 or 10 Gy) MB49 and T24 cancer cells treated with or without the added recombinant IL-1 $\beta$  protein (1 ng/ml or 2 ng/ml).

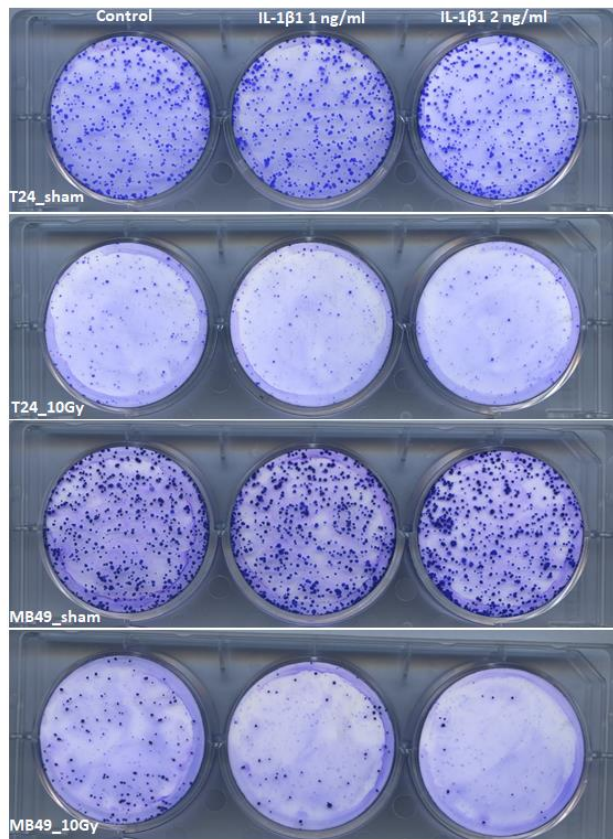

Supplement: jcm-08-01954-s001.pdf [file jcm-08-01954-s001.pdf]
